# Supplementary material for: Regional native plants visited by Melipona beecheii (Apidae, Meliponini) as nectar and pollen resources in the Yucatán Peninsula, Mexico
Source: Research Square preprint supplement (doi:10.21203/rs.3.rs-8714573/v1), 2026-01-29
Supplement: Supplementary file 1 [file 414aa69806ad60a5b41f1735.docx]

**Table 2.** Percentages of taxa recovered from *Melipona beecheii* pot-honey harvested in Quintana Roo State, Yucatán and Campeche, Mexico. Colours according to Louveaux et al. (1978) indicate: predominant pollen >45%); secondary pollen 16–45%; important minor pollen 3–15% and minor pollen <3%.

|  | **QUINTANA ROO** | | | | | | | | | | | | | **YUCATÁN** | | | | | | | | | | | | | | | **CAMPECHE** | | | | | | | | | |
| --- | --- | --- | --- | --- | --- | --- | --- | --- | --- | --- | --- | --- | --- | --- | --- | --- | --- | --- | --- | --- | --- | --- | --- | --- | --- | --- | --- | --- | --- | --- | --- | --- | --- | --- | --- | --- | --- | --- |
|  | **H-5332** | **H-5333** | **H-5334** | **H-5335** | **H-5336** | | **H-5337** | | **H-5338** | | **H-5339** | **H-5340** | **H-5341** | **H-5342** | **H-5343** | **H-5344** | **H-5345** | | **H-5346** | | **H-5347** | | **H-5348** | **H-5349** | **H-5350** | | **H-5351** | | **H-5395** | **H-5396** | | **H-5397** | **H-5398** | **H-5399** | **H-5400** | | **H-5401** | |
| **Amaranthaceae** |  |  |  |  |  | |  | |  | |  |  |  |  |  |  |  | |  | |  | |  |  |  | |  | |  |  | |  |  |  |  | |  | |
| *Alternanthera ramossisima* |  | |  | 0.7 | 0.3 | | 2.8 | | 0.5 | | 0.2 |  | 0.3 | 13.1 | 0.6 |  | 0.2 | | 0.2 | | 0.2 | |  |  |  | |  | |  |  | |  |  |  |  | |  | |
| **Anacardiaceae** |  |  |  |  |  | |  | |  | |  |  |  |  |  |  |  | |  | |  | |  |  |  | |  | |  |  | |  |  |  |  | |  | |
| *Metopium brownei* | 26.5 | 12.5 | 2.4 |  | |  | |  | |  | 2.4 | 0.2 |  |  | 0.2 |  | |  | |  | |  | 0.4 |  | |  | |  |  | |  | 0.9 | 0.1 |  | |  | |  |
| **Arecaceae** |  |  |  |  |  | |  | |  | |  |  |  |  |  |  |  | |  | |  | |  |  |  | |  | |  |  | |  |  |  |  | |  | |
| Arecaceae type | 0.5 | 3.0 | 1.3 | 0.2 |  | | 0.1 | |  | | 0.4 |  | 0.3 |  |  |  |  | |  | |  | |  |  |  | |  | |  |  | |  |  |  |  | |  | |
| **Asteraceae** |  |  |  |  |  | |  | |  | |  |  |  |  |  |  |  | |  | |  | |  |  |  | |  | |  |  | |  |  |  |  | |  | |
| Asteraceae type |  |  |  | 0.2 |  | | 0.3 | |  | |  |  |  |  |  |  |  | |  | |  | |  |  |  | |  | |  |  | |  |  |  |  | | 0.2 | |
| **Bignoniaceae** |  |  |  |  |  | |  | |  | |  |  |  |  |  |  |  | |  | |  | |  |  |  | |  | |  |  | |  |  |  |  | |  | |
| *Arrabidaea* aff. *podopogon* |  | |  |  | 0.2 | |  | | 0.3 | | 0.5 | 0.6 |  |  |  |  |  | |  | |  | |  |  |  | |  | |  |  | |  |  |  |  | |  | |
| Bignoniaceae type |  |  |  |  |  | |  | |  | |  |  |  |  |  |  |  | |  | |  | |  |  |  | |  | |  |  | |  |  |  | 0.2 | |  | |
| **Bixaceae** |  |  |  |  |  | |  | |  | |  |  |  |  |  |  |  | |  | |  | |  |  |  | |  | |  |  | |  |  |  |  | |  | |
| *Bixa orellana* |  |  |  |  |  | |  | |  | |  |  |  |  |  |  |  | | 0.4 | | 0.2 | |  |  |  | |  | |  |  | |  |  |  |  | |  | |
| *Cochlospermum vitifolium* |  | | 3.2 | 0.4 | 0.5 | | 25.3 | |  | | 0.4 | 9.1 | 0.8 | 10.6 | 16.2 |  | 0.2 | | 57.3 | | 50.8 | | 37.0 | 36.6 | 6.9 | |  | | 28.7 | 30.5 | | 53.2 | 35.5 | 20.6 | 33.9 | | 61.8 | |
| **Boraginaceae** |  |  |  |  |  | |  | |  | |  |  |  |  |  |  |  | |  | |  | |  |  |  | |  | |  |  | |  |  |  |  | |  | |
| *Cordia dodecandra* |  | 0.6 | 2.6 |  |  | |  | |  | |  |  | 0.2 |  |  |  |  | |  | |  | |  |  |  | |  | |  |  | |  |  |  |  | |  | |
| **Brassicaceae** |  |  |  |  |  | |  | |  | |  |  |  |  |  |  |  | |  | |  | |  |  |  | |  | |  |  | |  |  |  |  | |  | |
| *Brassica* sp. |  |  |  |  |  | |  | |  | |  | 0.2 |  |  |  |  |  | |  | |  | |  |  |  | |  | |  |  | |  |  |  |  | |  | |
| **Burseraceae** |  |  |  |  |  | |  | |  | |  |  |  |  |  |  |  | |  | |  | |  |  |  | |  | |  |  | |  |  |  |  | |  | |
| *Bursera schlechtendalii* | 1.0 | 0.6 | 2.4 | 1.6 | 0.7 | | 0.1 | |  | | 2.7 | 0.4 | 0.2 |  |  |  |  | | 0.2 | |  | |  |  |  | |  | | 0.9 | 1.4 | | 0.5 | 0.3 |  |  | |  | |
| *Bursera simaruba* | 10.3 | 22.1 | 26.6 | 49.0 | 18.6 | | 16.3 | | 0.5 | | 19.3 | 2.4 | 17.6 | 0.4 | 14.2 | 24.9 | 5.4 | | 6.8 | | 18.3 | | 45.1 | 0.4 |  | | 0.5 | | **42.9** | 7.0 | | 13.5 | 1.6 | 11.3 | 0.5 | | 1.7 | |
| **Clethraceae** |  |  |  |  |  | |  | |  | |  |  |  |  |  |  |  | |  | |  | |  |  |  | |  | |  |  | |  |  |  |  | |  | |
| *Clethra* sp. |  |  |  |  |  | |  | |  | |  |  |  |  |  |  |  | |  | |  | |  |  |  | |  | |  |  | |  |  |  | 0.2 | |  | |
| **Euphorbiaceae** |  |  |  |  |  | |  | |  | |  |  |  |  |  |  |  | |  | |  | |  |  |  | |  | |  |  | |  |  |  |  | |  | |
| *Croton* sp. |  | 2.8 | 0.2 | 2.9 | 0.9 | | 2.2 | | 19.1 | | 1.8 | 15.3 | 4.2 |  |  | 0.6 |  | |  | |  | |  |  |  | |  | |  |  | |  |  |  |  | |  | |
| *Gymnanthes lucida* |  |  |  |  |  | | 0.4 | |  | |  | 10.3 | 8.3 |  |  |  |  | |  | |  | |  |  |  | | 0.2 | |  |  | |  |  |  |  | |  | |
| **Fabaceae** |  |  |  |  |  | |  | |  | |  |  |  |  |  |  |  | |  | |  | |  |  |  | |  | |  |  | |  |  |  |  | |  | |
| *Acaciella angustissima* |  |  |  |  |  | |  | |  | |  |  |  |  |  |  |  | |  | | 0.2 | |  |  |  | |  | |  |  | |  |  |  |  | |  | |
| *Aeschynomene* sp. |  |  |  |  |  | |  | |  | |  |  |  |  |  |  |  | |  | |  | |  |  |  | |  | |  |  | |  |  |  | 0.2 | |  | |
| *Caesalpinia gaumeri* |  |  |  |  |  | |  | |  | |  | 0.2 |  |  |  |  |  | |  | |  | |  |  |  | |  | |  |  | |  |  |  |  | |  | |
| *Crotalaria* sp. | 0.8 |  | 0.4 |  | 0.2 | | 0.9 | | 0.7 | |  | 0.7 |  | 1.3 | 2.2 | 3.9 | 3.6 | | 0.6 | | 0.7 | | 2.4 | 0.5 | 8.5 | | 1.1 | |  |  | |  |  |  |  | |  | |
| *Desmodium* sp. |  |  |  | 0.4 |  | |  | |  | |  |  | 1.9 |  |  |  |  | |  | |  | |  |  |  | | 0.2 | |  |  | |  |  |  |  | |  | |
| Fabaceae type |  |  |  |  |  | |  | |  | |  | 0.2 |  |  |  |  |  | |  | |  | |  |  |  | |  | |  |  | |  |  |  |  | |  | |
| *Leucaena* *leucocephala* |  |  |  | 0.2 | 0.3 | |  | | 0.2 | |  | 0.7 | 2.2 |  |  |  |  | |  | |  | |  |  |  | | 0.2 | |  |  | |  |  |  |  | |  | |
| *Lonchocarpus* sp. |  |  | 0.8 |  | 0.7 | | 0.1 | |  | | 0.4 |  |  |  | 0.2 |  | 0.7 | |  | |  | | 0.2 | 0.4 |  | |  | |  |  | |  |  | 3.2 |  | |  | |
| *Lonchocarpus Yucatánensis* |  | | 6.8 |  | 0.3 | |  | |  | |  |  |  |  |  |  |  | |  | |  | |  |  |  | |  | |  |  | |  |  |  |  | |  | |
| *Mimosa albida* |  | 0.6 | 0.2 |  |  | |  | | 0.5 | |  |  |  |  |  |  |  | |  | |  | |  |  |  | |  | |  |  | |  |  |  |  | |  | |
| *Mimosa bahamensis* | 0.8 | 8.9 | 2.8 | 3.6 | 14.1 | | 1.5 | | 0.9 | | 0.7 | 0.7 | 0.7 |  | 18.4 | 34.5 | 1.3 | | 3.8 | | 1.7 | | 1.8 | 4.7 | 7.6 | | 1.6 | | 0.2 | 0.2 | | 3.7 | 55.4 | 58.5 |  | | 2.4 | |
| *Mimosa pudica* |  |  |  |  |  | |  | |  | | 0.2 |  |  |  |  |  |  | |  | |  | |  |  |  | |  | |  |  | |  |  |  |  | |  | |
| *Mimosa* sp. | 0.3 |  | 0.8 |  | 0.5 | | 1.8 | | 1.0 | | 0.2 | 0.9 |  | 0.4 | 0.6 | 0.2 | 0.2 | | 1.9 | | 2.4 | | 0.4 | 0.2 | 0.2 | | 0.4 | | 0.2 | 0.2 | |  | 0.3 |  |  | |  | |
| *Piscidia piscipula* |  |  |  |  |  | |  | |  | |  |  |  |  | 0.6 | 1.5 |  | |  | |  | |  |  |  | | 0.2 | | 0.9 | 0.7 | | 13.8 | 0.7 | 1.8 | 3.8 | | 2.1 | |
| *Rhynchosia senna* var. *diversifolia* |  |  |  |  |  | |  | | 0.9 | |  |  |  |  |  |  |  | |  | |  | |  |  |  | |  | |  |  | |  |  |  |  | |  | |
| *Senna cobanensis* |  |  |  |  |  | |  | |  | |  |  |  |  |  |  |  | |  | |  | |  |  |  | |  | |  |  | |  |  | 1.3 |  | | 0.4 | |
| *Senna hirsuta* |  |  | 2.1 |  |  | |  | |  | | 0.2 |  |  |  |  |  |  | |  | |  | |  |  |  | | 0.4 | |  |  | |  |  |  |  | |  | |
| *Senna racemosa* | 17.9 | 0.4 | 6.6 | 5.1 | 35.7 | | 8.7 | |  | | 4.4 | 4.7 | 5.4 | 2.0 | 12.9 | 6.6 | 12.2 | | 9.0 | | 10.2 | | 4.6 | 17.9 | 7.8 | | 32.4 | | 10.9 | 55.7 | | 3.5 |  | 0.3 | 27.4 | | 26.5 | |
| *Senna undulata* |  |  |  |  |  | |  | |  | |  |  |  |  |  |  |  | |  | |  | |  |  |  | |  | |  |  | |  | 0.4 |  |  | |  | |
| *Senna uniflora* |  |  |  |  |  | |  | |  | |  |  |  |  |  |  |  | |  | |  | |  |  |  | |  | | 2.2 |  | |  |  |  |  | |  | |
| *Senna villosa* |  |  |  |  |  | |  | |  | |  |  |  |  |  |  |  | |  | |  | |  |  |  | |  | |  | 0.7 | | 0.2 | 3.7 | 1.8 |  | | 0.4 | |
| *Vachelia cornigera* |  |  |  |  |  | |  | |  | |  |  |  |  |  |  | 0.2 | |  | |  | |  |  |  | |  | |  |  | |  |  |  |  | |  | |
| *Vachelia* sp. | 0.2 |  |  |  |  | |  | |  | |  |  |  |  |  |  |  | |  | |  | |  |  |  | |  | | 0.2 |  | |  |  |  |  | |  | |
| **Fagaceae** |  |  |  |  |  | |  | |  | |  |  |  |  |  |  |  | |  | |  | |  |  |  | |  | |  |  | |  |  |  |  | |  | |
| *Quercus oleoides* |  |  | 0.2 |  |  | |  | |  | |  |  |  |  |  |  |  | |  | |  | |  |  |  | |  | |  |  | |  |  |  |  | |  | |
| **Loranthaceae** |  |  |  |  |  | |  | |  | |  |  |  |  |  |  |  | |  | |  | |  |  |  | |  | |  |  | |  |  |  |  | |  | |
| *Psittacanthus mayanus* |  |  | 0.2 |  |  | |  | |  | |  |  |  |  |  |  |  | |  | |  | |  |  |  | |  | |  |  | |  |  |  |  | |  | |
| **Malpighiaceae** |  |  |  |  |  | |  | |  | |  |  |  |  |  |  |  | |  | |  | |  |  |  | |  | |  |  | |  |  |  |  | |  | |
| aff. *Byrsonima* |  |  | 4.7 |  |  | |  | |  | |  |  |  |  |  |  |  | |  | |  | |  |  |  | |  | |  |  | |  |  |  |  | |  | |
| *Byrsonima bucidifolia* |  |  |  |  |  | |  | |  | |  |  |  | 2.5 | 0.2 | 2.3 | 1.8 | | 0.2 | | 1.0 | |  | 1.6 |  | | 2.1 | | 3.2 | 0.2 | |  |  |  |  | |  | |
| *Byrsonima crassifolia* | 0.8 | 2.8 | 0.4 | 0.7 |  | | 2.8 | |  | | 0.4 | 0.6 | 1.9 |  |  |  |  | |  | |  | |  |  |  | |  | |  |  | |  |  |  |  | |  | |
| **Malvaceae** |  |  |  |  |  | |  | |  | |  |  |  |  |  |  |  | |  | |  | |  |  |  | |  | |  |  | |  |  |  |  | |  | |
| *Guazuma ulmifolia* |  |  |  |  |  | |  | |  | |  |  |  | 0.2 |  | 0.2 |  | |  | |  | |  |  |  | |  | |  |  | |  |  |  |  | |  | |
| **Melastomataceae** |  |  |  |  |  | |  | |  | |  |  |  |  |  |  |  | |  | |  | |  |  |  | |  | |  |  | |  |  |  |  | |  | |
| *Miconia* sp. |  |  |  |  |  | |  | |  | |  |  | 0.2 |  |  |  |  | |  | |  | |  |  |  | |  | |  |  | |  |  |  |  | |  | |
| **Meliaceae** |  |  |  |  |  | |  | |  | |  |  |  |  |  |  |  | |  | |  | |  |  |  | |  | |  |  | |  |  |  |  | |  | |
| *Cedrela odorata* |  |  | 0.4 |  |  | |  | |  | | 0.2 |  | 0.2 |  |  |  |  | |  | |  | |  |  |  | |  | |  |  | |  |  |  |  | |  | |
| **Myrtaceae** |  |  |  |  |  | |  | |  | |  |  |  |  |  |  |  | |  | |  | |  |  |  | |  | |  |  | |  |  |  |  | |  | |
| *Eugenia* aff. *axilaris* | 35.8 | 11.3 | 1.9 | 1.8 | 0.5 | | 7.3 | | 3.8 | |  | 11.0 | 3.7 |  |  |  |  | |  | |  | |  |  |  | |  | |  |  | |  |  |  |  | |  | |
| *Eugenia* sp. |  |  |  |  |  | |  | |  | |  |  |  | 59.4 | 3.1 | 3.6 | 3.8 | | 3.0 | | 1.9 | | 2.6 | 0.5 | 2.5 | | 16.1 | | 3.9 | 0.7 | | 0.5 |  |  | 0.5 | |  | |
| *Pimenta dioica* |  |  |  |  |  | | 0.3 | |  | |  |  |  |  |  |  |  | |  | |  | |  |  |  | |  | |  |  | |  |  |  |  | |  | |
| **Olacaceae** |  |  |  |  |  | |  | |  | |  |  |  |  |  |  |  | |  | |  | |  |  |  | |  | |  |  | |  |  |  |  | |  | |
| *Ximenia americana* |  |  |  |  |  | |  | |  | |  |  | 0.2 |  |  |  | 0.2 | |  | |  | |  |  |  | | 0.7 | | 1.9 |  | | 1.1 |  |  | 0.2 | |  | |
| **Passifloraceae** |  |  |  |  |  | |  | |  | |  |  |  |  |  |  |  | |  | |  | |  |  |  | |  | |  |  | |  |  |  |  | |  | |
| *Passiflora* sp. |  |  | 8.1 |  |  | |  | |  | |  |  |  |  |  |  |  | |  | |  | |  |  | 0.2 | |  | |  |  | |  |  |  |  | |  | |
| **Piperaceae** |  |  |  |  |  | |  | |  | |  |  |  |  |  |  |  | |  | |  | |  |  |  | |  | |  |  | |  |  |  |  | |  | |
| *Piper* sp. |  |  |  |  |  | |  | |  | |  | 1.3 | 18.6 |  |  |  |  | |  | |  | |  |  |  | |  | |  | 0.2 | |  |  |  |  | |  | |
| **Polygonaceae** |  |  |  |  |  | |  | |  | |  |  |  |  |  |  |  | |  | |  | |  |  |  | |  | |  |  | |  |  |  |  | |  | |
| *Coccoloba diversifolia* | 2.2 | 2.4 |  |  |  | |  | |  | |  |  |  |  |  |  |  | |  | |  | |  |  |  | |  | |  |  | |  |  |  |  | |  | |
| *Gymnopodium floribundum* |  | | 0.9 | 0.9 | 0.5 | | 3.1 | |  | | 1.3 | 0.4 | 0.5 | 1.3 | 18.8 | 2.4 | 49.6 | | 5.8 | | 5.2 | | 1.7 | 20.2 | 55.2 | | 17.7 | | 1.5 | 0.2 | | 6.6 | 0.3 | 0.5 | 31.4 | |  | |
| **Ranunculaceae** |  |  |  |  |  | |  | |  | |  |  |  |  |  |  |  | |  | |  | |  |  |  | |  | |  |  | |  |  |  |  | |  | |
| *Clematis* sp. |  |  |  |  |  | |  | | 1.0 | |  |  |  |  |  |  |  | |  | |  | |  |  |  | |  | |  |  | |  |  |  |  | |  | |
| **Rhamnaceae** |  |  |  |  |  | |  | |  | |  |  |  |  |  |  |  | |  | |  | |  |  |  | |  | |  |  | |  |  |  |  | |  | |
| *Colubrina* sp. | 0.3 |  |  |  |  | | 0.3 | |  | |  | 2.1 | 0.8 |  |  |  |  | |  | |  | |  |  |  | |  | |  |  | |  |  |  |  | |  | |
| *Ziziphus* sp. |  |  |  |  |  | |  | |  | |  |  |  |  |  | 9.4 | 0.3 | |  | |  | |  |  | 2.1 | |  | |  |  | |  |  |  |  | |  | |
| **Rubiaceae** |  |  |  |  |  | |  | |  | |  |  |  |  |  |  |  | |  | |  | |  |  |  | |  | |  |  | |  |  |  |  | |  | |
| *Randia aculeata* |  |  |  |  |  | |  | |  | |  |  |  |  |  |  | 0.2 | |  | |  | |  |  | 0.2 | |  | |  |  | |  |  |  |  | |  | |
| Rubiaceae type |  |  | 0.2 |  |  | |  | |  | |  |  |  |  |  |  |  | |  | |  | |  |  |  | |  | |  |  | |  | 0.4 | 0.2 |  | |  | |
| *Spermacoce* sp. |  | 0.2 |  |  |  | |  | |  | |  |  |  |  |  |  |  | |  | |  | |  |  |  | |  | |  |  | |  |  |  |  | |  | |
| **Rutaceae** |  |  |  |  |  | |  | |  | |  |  |  |  |  |  |  | |  | |  | |  |  |  | |  | |  |  | |  |  |  |  | |  | |
| *Citrus* sp. |  |  |  |  |  | |  | |  | |  |  | 0.2 |  |  |  | 0.2 | |  | |  | |  |  |  | |  | |  |  | | 0.2 |  |  |  | |  | |
| **Sapindaceae** |  |  |  |  |  | |  | |  | |  |  |  |  |  |  |  | |  | |  | |  |  |  | |  | |  |  | |  |  |  |  | |  | |
| *Melicoccus oliviformis* | 0.8 | 21.9 | 1.1 | 26.8 | 14.6 | | 12.4 | | 39.3 | | 53.6 | 9.5 | 15.9 | 0.2 | 1.8 | 8.3 | 2.6 | |  | |  | |  | 10.0 | 4.4 | | 15.8 | |  |  | |  |  |  |  | |  | |
| *Sapindus saponaria* |  |  |  |  |  | |  | |  | |  |  |  |  |  |  |  | |  | |  | |  |  |  | |  | | 1.1 |  | |  |  |  |  | |  | |
| *Serjania goniocarpa* |  |  | 0.6 | 0.4 | 0.2 | |  | | 0.3 | |  |  |  |  |  |  |  | |  | |  | |  |  |  | |  | |  |  | |  |  |  |  | |  | |
| *Serjania Yucatánensis* |  |  |  |  |  | |  | | 13.5 | |  | 4.1 |  |  |  |  |  | |  | |  | |  |  |  | |  | |  |  | |  |  |  |  | |  | |
| *Thouinia canescens* |  |  |  |  |  | |  | |  | |  |  |  |  |  |  |  | |  | |  | |  |  |  | |  | | 0.4 |  | | 2.0 |  |  | 0.9 | |  | |
| *Thouinia paucidentata* |  | 1.2 | 0.9 | 0.4 |  | | 0.6 | |  | | 0.7 |  | 2.4 |  | 4.8 | 0.2 | 7.4 | |  | | 0.8 | | 0.9 | 0.7 | 0.4 | | 0.5 | |  |  | |  |  |  |  | |  | |
| **Sapotaceae** |  |  |  |  |  | |  | |  | |  |  |  |  |  |  |  | |  | |  | |  |  |  | |  | |  |  | |  |  |  |  | |  | |
| *Chrysophyllum cainito* | 0.3 | 5.0 |  |  | 0.2 | | 0.3 | |  | |  |  | 0.2 |  |  |  |  | |  | |  | |  |  |  | |  | |  |  | |  |  |  |  | |  | |
| **Solanaceae** |  |  |  |  |  | |  | |  | |  |  |  |  |  |  |  | |  | |  | |  |  |  | |  | |  |  | |  |  |  |  | |  | |
| *Solanum donianum* |  | 0.2 |  |  |  | | 0.6 | | 7.7 | | 4.2 | 0.4 | 0.7 |  |  |  |  | |  | |  | |  |  |  | | 1.8 | |  |  | |  |  |  |  | |  | |
| *Solanum erianthum* | 1.3 |  | 13.9 | 3.5 | 3.0 | | 11.2 | | 7.7 | | 5.7 | 14.7 | 9.3 | 8.6 | 5.3 | 1.6 | 9.9 | | 8.1 | | 6.4 | | 2.6 | 6.2 | 3.9 | | 7.8 | | 0.9 | 2.3 | | 0.2 | 0.1 |  | 0.9 | | 4.3 | |
| *Solanum lanceifolium* |  |  |  |  |  | |  | |  | |  | 3.2 |  |  |  |  |  | |  | |  | |  |  |  | |  | |  |  | |  |  |  |  | |  | |
| *Solanum nudum* |  | 3.0 | 0.9 | 0.4 |  | |  | | 1.7 | | 0.2 |  |  |  |  |  |  | |  | |  | |  |  |  | |  | |  |  | |  |  |  |  | |  | |
| *Solanum torvum* |  |  | 3.4 |  |  | |  | |  | |  | 5.6 |  |  |  |  |  | | 2.8 | | 0.2 | | 0.4 |  |  | | 0.2 | |  |  | |  |  |  |  | |  | |
| *Solanum tuerckheimii* |  |  | 2.8 | 0.4 |  | |  | |  | |  |  |  |  |  |  |  | |  | |  | |  |  |  | |  | |  |  | |  |  |  |  | |  | |
| **Sterculiaceae** |  |  |  |  |  | |  | |  | |  |  |  |  |  |  |  | |  | |  | |  |  |  | |  | |  |  | |  |  |  |  | |  | |
| *Walteria americana* |  |  |  |  |  | |  | |  | |  |  |  |  |  |  |  | |  | |  | |  |  |  | |  | |  |  | |  | 1.0 | 0.6 |  | | 0.4 | |
| **Tiliaceae** |  |  |  |  |  | |  | |  | |  |  |  |  |  |  |  | |  | |  | |  |  |  | |  | |  |  | |  |  |  |  | |  | |
| Tiliaceae type |  |  |  |  |  | |  | |  | |  |  |  |  |  |  |  | |  | |  | |  |  |  | |  | |  |  | | 0.2 |  |  |  | |  | |
| **Ulmaceae** |  |  |  |  |  | |  | |  | |  |  |  |  |  |  |  | |  | |  | |  |  |  | |  | |  |  | |  |  |  |  | |  | |
| *Trema micrantha* |  |  |  | 0.6 | 7.8 | |  | |  | |  |  | 1.0 | 0.2 |  |  | 0.2 | |  | |  | |  |  |  | | 0.2 | |  |  | |  |  |  |  | |  | |
| **Ulmaceae** |  |  |  |  |  | |  | |  | |  |  |  |  |  |  |  | |  | |  | |  |  |  | |  | |  |  | |  |  |  |  | |  | |
| Ulmaceae type |  |  |  |  |  | |  | |  | |  |  |  |  |  |  |  | |  | |  | |  |  |  | | 0.2 | |  |  | |  |  |  |  | |  | |
| **Urticaceae** |  |  |  |  |  | |  | |  | |  |  |  |  |  |  |  | |  | |  | |  |  |  | |  | |  |  | |  |  |  |  | |  | |
| *Cecropia* sp. |  | 0.2 |  |  |  | | 0.1 | |  | |  | 0.4 | 1.5 |  |  |  |  | |  | |  | |  |  |  | |  | |  |  | |  |  |  |  | |  | |
| *Pilea* sp. |  |  |  |  |  | |  | |  | |  |  | 0.2 |  |  |  |  | |  | |  | |  |  |  | |  | |  |  | |  |  |  |  | |  | |
| **Verbenaceae** |  |  |  |  |  | |  | |  | |  |  |  |  |  |  |  | |  | |  | |  |  |  | |  | |  |  | |  |  |  |  | |  | |
| *Phyla stoechadifolia* |  |  | 0.2 |  |  | |  | |  | |  |  |  |  |  |  |  | |  | |  | |  |  |  | |  | |  |  | |  |  |  |  | |  | |
| **Undetermined** |  |  |  |  |  | |  | |  | |  |  |  |  |  |  |  | |  | |  | |  |  |  | |  | |  |  | |  |  |  |  | |  | |
| Type 1 |  | 0.2 |  |  |  | | 0.1 | | 0.3 | | 0.2 | 0.2 | 0.2 |  |  |  |  | |  | |  | |  |  |  | |  | |  |  | |  |  |  |  | |  | |
| Type 2 |  | 0.2 |  |  |  | |  | |  | |  |  |  |  |  |  |  | |  | |  | |  |  |  | |  | |  |  | |  |  |  |  | |  | |
| Type 3 |  |  |  |  |  | |  | |  | |  |  | 0.2 |  |  |  |  | |  | |  | |  |  |  | |  | |  |  | |  |  |  |  | |  | |
| **Richness** | **16** | **21** | **32** | **21** | **20** | | **25** | | **19** | | **22** | **28** | **31** | **13** | **16** | **15** | **20** | | **14** | | **15** | | **13** | **13** | **13** | | **21** | | **16** | **13** | | **15** | **13** | **11** | **12** | | **10** | |
| **Absolute quantity of pollen grains in 10mL of honey** | **1520090** | **57351** | **26117** | **1377112** | **1439822** | | **559373** | | **366854** | | **1374603** | **672251** | **739978** | **464890** | **272412** | **1550191** | **507533** | | **266392** | | **494155** | | **340515** | **1377112** | **706115** | | **177156** | | **1339486** | **1404704** | | **1414738** | **1770930** | **1557716** | **180291** | | **336126** | |
| **Group (Louveaux et al. 1978)** | **V** | **IV** | **II** | **V** | **V** | | **IV** | | **III** | | **V** | **IV** | **IV** | **III** | **III** | **V** | **IV** | | **III** | | **III** | | **III** | **V** | **IV** | | **III** | | **V** | **V** | | **V** | **V** | **V** | **III** | | **III** | |
