# Supplementary material for: Regional native plants visited by Melipona beecheii (Apidae, Meliponini) as nectar and pollen resources in the Yucatán Peninsula, Mexico
Source: Research Square preprint supplement (doi:10.21203/rs.3.rs-8714573/v1), 2026-01-29
Supplement: Supplementary file 2 [file c2cafc70b18a729533787da1.docx]

**Table 1.** List of pot-honey samples of *Melipona beecheii* collected in Quintana Roo, Yucatán and Campeche during 2013. Identification number (ID) on the map (Figure 1) and catalogue number (Num.) in the palynological collection of LABPALINO.

| **ID** | **Num.** | **State** | **Locality** | **Municipality** | **Date of harvest** |
| --- | --- | --- | --- | --- | --- |
| **1** | **H-5332** | Quintana Roo | Chetumal | Othon P. Blanco | 22/05/2023 |
| **2** | **H-5333** | Quintana Roo | San Ángel | Lázaro Cárdenas | 28/05/2023 |
| **3** | **H-5334** | Quintana Roo | Kantunilkín | Lázaro Cárdenas | 28/05/2023 |
| **4** | **H-5335** | Quintana Roo | Tihosuco | Felipe Carrillo Puerto | 28/05/2023 |
| **5** | **H-5336** | Quintana Roo | Tihosuco | Felipe Carrillo Puerto | 28/05/2023 |
| **6** | **H-5337** | Quintana Roo | José María Morelos | José María Morelos | 29/05/2023 |
| **7** | **H-5338** | Quintana Roo | Santa Gertrudis | José María Morelos | 29/05/2023 |
| **8** | **H-5339** | Quintana Roo | La Presumida | José María Morelos | 30/05/2023 |
| **9** | **H-5340** | Quintana Roo | San Diego | José María Morelos | 30/05/2023 |
| **10** | **H-5341** | Quintana Roo | La Presumida | José María Morelos | 30/05/2023 |
| **11** | **H-5342** | Yucatán | Chacsinkín | Chaksinkín | 31/05/2023 |
| **12** | **H-5343** | Yucatán | Tipikal | Maní | 31/05/2023 |
| **13** | **H-5344** | Yucatán | Maní | Maní | 31/05/2023 |
| **14** | **H-5345** | Yucatán | Mama | Mama | 31/05/2023 |
| **15** | **H-5346** | Yucatán | Kimbilá | Tixmehuac | 31/05/2023 |
| **16** | **H-5347** | Yucatán | Kimbilá | Tixmehuac | 31/05/2023 |
| **17** | **H-5348** | Yucatán | Dzutoh | Tixmehuac | 31/05/2023 |
| **18** | **H-5349** | Yucatán | Xaya | Tekax | 31/05/2023 |
| **19** | **H-5350** | Yucatán | Tixpéhual | Tixpéhual | 31/05/2023 |
| **20** | **H-5351** | Yucatán | Tekit | Tekit | 31/05/2023 |
| **21** | **H-5395** | Campeche | Santa María | Calkiní | 24/10/2023 |
| **22** | **H-5396** | Campeche | Concepción | Calkiní | 24/10/2023 |
| **23** | **H-5397** | Campeche | Tankuché | Calkiní | 24/10/2023 |
| **24** | **H-5398** | Campeche | Tankuché | Calkiní | 24/10/2023 |
| **25** | **H-5399** | Campeche | Tankuché | Calkiní | 24/10/2023 |
| **26** | **H-5400** | Campeche | Pucnachén | Calkiní | 24/10/2023 |
| **27** | **H-5401** | Campeche | San Antonio Sahcabchén | Calkiní | 24/10/2023 |
